# Supplementary material
Source: HighWire-hosted journal article supplement (https://bmjopen.bmj.com/content/12/4/e055668)
Supplement: inline-supplementary-material-1 [file inline-supplementary-material-1.pdf]

## Supplementary Tables

**Table 1. Access to hypertension care and services among People Living with HIV (N=71)**

|                                                 | Overall<br>n (%) | Male<br>n (%) | Female<br>n (%) |
|-------------------------------------------------|------------------|---------------|-----------------|
| <b>Age</b>                                      |                  |               |                 |
| 25-44                                           | 49 (68.3)        | 15 (52.7)     | 34 (78.6)       |
| 45-64                                           | 23 (31.7)        | 13 (47.3)     | 9 (21.4)        |
| <b>Residential area of the district</b>         |                  |               |                 |
| Urban area                                      | 3 (4.3)          | 0 (0.0)       | 3 (7.1)         |
| Rural area                                      | 68 (95.7)        | 28 (100.0)    | 40 (92.9)       |
| <b>Blood pressure</b>                           |                  |               |                 |
| High (hypertension)                             | 20 (27.3)        | 9 (32.7)      | 10 (23.8)       |
| <b>Access to hypertension care and services</b> |                  |               |                 |
| Have never blood pressure measured              | 8 (11.5)         | 7 (23.6)      | 2 (3.6)         |
| Diagnosed as hypertensive                       | 5 (7.2)          | 4 (12.7)      | 2 (3.6)         |
| On treatment                                    | 0 (0.0)          | 0 (0.0)       | 0 (0.0)         |

Totals of percentages may differ from 100 due to rounding. Weighted values are rounded to the nearest integer. Hypertension is defined as SBP  $\geq$  140 mmHg or DBP  $\geq$  90 mmHg.

**Table 2. Bivariate and Multivariate correlates of hypertension among all participants in the Mumbwa district, Central Province of Zambia, 2016 (by gender)**

|                                                                      | Male         |            |                    |         |                     |         | Female       |            |                     |         |                     |         |
|----------------------------------------------------------------------|--------------|------------|--------------------|---------|---------------------|---------|--------------|------------|---------------------|---------|---------------------|---------|
|                                                                      | Hypertension |            | Crude OR (95%CI)   | p value | Adjusted OR (95%CI) | p value | Hypertension |            | Crude OR (95%CI)    | p value | Adjusted OR (95%CI) | p value |
|                                                                      | n            | n(%)       |                    |         |                     |         | n            | n(%)       |                     |         |                     |         |
| <b>Socio-demographic characteristics</b>                             |              |            |                    |         |                     |         |              |            |                     |         |                     |         |
| Age                                                                  |              |            |                    |         |                     |         |              |            |                     |         |                     |         |
| 25-44                                                                | 203          | 70 (34.7)  | 1 (Reference)      |         | 1 (Reference)       |         | 226          | 53 (23.6)  | 1 (Reference)       |         | 1 (Reference)       |         |
| 45-64                                                                | 132          | 63 (47.5)  | 1.05 (1.250-3.133) | <0.01   | 1.57 (0.95-2.58)    | 0.07    | 128          | 65 (51.0)  | 3.54 (2.236-5.616)  | <0.01   | 2.68 (1.56-4.63)    | <0.01   |
| Marital Status                                                       |              |            |                    |         |                     |         |              |            |                     |         |                     |         |
| Not married                                                          | 20           | 7 (34.2)   | 1 (Reference)      |         | –                   |         | 7            | 2 (21.4)   | 1 (Reference)       |         | –                   |         |
| Married                                                              | 300          | 120 (40.0) | 1.78 (0.628-5.025) | 0.29    | –                   |         | 257          | 81 (31.4)  | 2.01 (0.424-9.534)  | 0.38    | –                   |         |
| Divorced/Widow/Widowed                                               | 16           | 7 (41.9)   | 1.75 (0.442-6.928) | 0.43    | –                   |         | 90           | 36 (40.6)  | 3.34 (0.686-16.232) | 0.14    | –                   |         |
| Education                                                            |              |            |                    |         |                     |         |              |            |                     |         |                     |         |
| ≤primary                                                             | 229          | 90 (39.6)  | 1 (Reference)      |         | –                   |         | 284          | 95 (33.3)  | 1 (Reference)       |         | 1 (Reference)       |         |
| Secondary                                                            | 77           | 32 (41.3)  | 1.09 (0.644-1.860) | 0.74    | –                   |         | 50           | 12 (24.5)  | 0.83 (0.426-1.617)  | 0.58    | 0.68 (0.32-1.45)    | 0.32    |
| ≥college                                                             | 29           | 11 (36.8)  | 1.03 (0.469-2.283) | 0.93    | –                   |         | 20           | 12 (59.0)  | 3.85 (1.488-9.974)  | <0.01   | 3.39 (1.19-9.64)    | 0.02    |
| Work Status                                                          |              |            |                    |         |                     |         |              |            |                     |         |                     |         |
| Employed                                                             | 58           | 19 (33.0)  | 1 (Reference)      |         | 1 (Reference)       |         | 28           | 10 (35.2)  | 1 (Reference)       |         | –                   |         |
| Self-employed                                                        | 255          | 102 (39.8) | 1.34 (0.726-2.456) | 0.35    | 1.43 (0.74-2.78)    | 0.29    | 225          | 77 (34.0)  | 0.84 (0.388-1.820)  | 0.66    | –                   |         |
| Unemployed/Retired                                                   | 22           | 12 (55.8)  | 2.80 (1.025-7.646) | 0.045   | 1.95 (0.66-5.75)    | 0.22    | 101          | 32 (32.0)  | 0.69 (0.299-1.596)  | 0.39    | –                   |         |
| Monthly income (USD)                                                 |              |            |                    |         |                     |         |              |            |                     |         |                     |         |
| ≤50                                                                  | 157          | 61 (38.9)  | 1 (Reference)      |         | –                   |         | 169          | 51 (30.1)  | 1 (Reference)       |         | –                   |         |
| >50                                                                  | 178          | 72 (40.5)  | 1.02 (0.652-1.599) | 0.93    | –                   |         | 185          | 68 (36.7)  | 1.29 (0.832-2.011)  | 0.25    | –                   |         |
| Residential area                                                     |              |            |                    |         |                     |         |              |            |                     |         |                     |         |
| Rural                                                                | 300          | 112 (37.2) | 1 (Reference)      |         | 1 (Reference)       |         | 302          | 102 (33.7) | 1 (Reference)       |         | –                   |         |
| Urban                                                                | 35           | 22 (61.8)  | 2.46 (1.176-5.144) | 0.02    | 2.46 (1.09-5.56)    | 0.03    | 52           | 17 (32.7)  | 0.98 (0.528-1.802)  | 0.94    | –                   |         |
| Food security                                                        |              |            |                    |         |                     |         |              |            |                     |         |                     |         |
| Secure                                                               | 107          | 33 (31.1)  | 1 (Reference)      |         | –                   |         | 85           | 25 (29.1)  | 1 (Reference)       |         | –                   |         |
| Insecure                                                             | 228          | 100 (43.8) | 1.47 (0.901-2.399) | 0.12    | –                   |         | 269          | 94 (34.9)  | 1.39 (0.822-2.353)  | 0.22    | –                   |         |
| Family planning                                                      |              |            |                    |         |                     |         |              |            |                     |         |                     |         |
| Not used                                                             | –            | –          | –                  |         | –                   |         | 249          | 96 (38.6)  | 1 (Reference)       |         | 1 (Reference)       |         |
| Used                                                                 | –            | –          | –                  |         | –                   |         | 101          | 96 (21.8)  | 0.42 (0.248-0.724)  | <0.01   | 0.61 (0.32-1.153)   | 0.13    |
| No data                                                              | –            | –          | –                  |         | –                   |         | 4            | 1 (14.3)   | –                   |         | –                   |         |
| <b>Behavioral and psychological characteristic</b>                   |              |            |                    |         |                     |         |              |            |                     |         |                     |         |
| Smoking                                                              |              |            |                    |         |                     |         |              |            |                     |         |                     |         |
| Never                                                                | 185          | 66 (35.8)  | 1 (Reference)      |         | –                   |         | 340          | 113 (33.1) | 1 (Reference)       |         | –                   |         |
| Ex-smoker                                                            | 74           | 33 (44.4)  | 1.42 (0.816-2.463) | 0.22    | –                   |         | 12           | 4 (34.8)   | 0.74 (0.192-2.831)  | 0.66    | –                   |         |
| Current smoker                                                       | 76           | 34 (44.6)  | 1.42 (0.889-2.724) | 0.11    | –                   |         | 3            | 2 (80.0)   | 3.93 (0.353-43.805) | 0.27    | –                   |         |
| Alcohol                                                              |              |            |                    |         |                     |         |              |            |                     |         |                     |         |
| Never                                                                | 102          | 30 (29.3)  | 1 (Reference)      |         | 1 (Reference)       |         | 252          | 77 (30.3)  | 1 (Reference)       |         | 1 (Reference)       |         |
| ≤a few times/m                                                       | 123          | 49 (39.6)  | 1.66 (0.938-2.937) | 0.08    | 1.43 (0.78-2.59)    | 0.24    | 82           | 31 (38.1)  | 1.40 (0.844-2.320)  | 0.19    | 1.79 (1.01-3.19)    | 0.046   |
| ≥a few times/w or everyday                                           | 110          | 54 (49.5)  | 2.37 (1.323-4.248) | <0.01   | 2.28 (1.24-4.17)    | 0.01    | 20           | 11 (55.3)  | 2.49 (1.014-6.110)  | 0.046   | 1.61 (0.58-4.49)    | 0.37    |
| Fruit and vegetable intake (fruits ≥once a week, vegetables daily)   |              |            |                    |         |                     |         |              |            |                     |         |                     |         |
| Neither                                                              | 50           | 20 (40.2)  | 1 (Reference)      |         | –                   |         | 51           | 14 (27.0)  | 1 (Reference)       |         | –                   |         |
| Either                                                               | 159          | 66 (41.3)  | 1.06 (0.548-2.015) | 0.86    | –                   |         | 160          | 53 (33.3)  | 1.18 (0.570-2.422)  | 0.66    | –                   |         |
| Both                                                                 | 126          | 47 (37.6)  | 1.15 (0.585-2.253) | 0.69    | –                   |         | 142          | 51 (36.1)  | 1.44 (0.697-2.975)  | 0.32    | –                   |         |
| Physical activity (activities of daily life and sports ≥once a week) |              |            |                    |         |                     |         |              |            |                     |         |                     |         |
| Neither                                                              | 16           | 8 (46.9)   | 1 (Reference)      |         | –                   |         | 38           | 17 (45.9)  | 1 (Reference)       |         | 1 (Reference)       |         |
| Either                                                               | 215          | 96 (44.7)  | 0.99 (0.361-2.696) | 0.98    | –                   |         | 282          | 86 (30.4)  | 0.52 (0.266-1.032)  | 0.06    | 0.51 (0.24-1.08)    | 0.08    |
| Both                                                                 | 104          | 29 (28.2)  | 0.53 (0.185-1.527) | 0.24    | –                   |         | 34           | 15 (45.5)  | 0.91 (0.354-2.324)  | 0.84    | 1.60 (0.54-4.71)    | 0.40    |
| Salt intake (per day)                                                |              |            |                    |         |                     |         |              |            |                     |         |                     |         |
| <5g                                                                  | 228          | 89 (39.2)  | 1 (Reference)      |         | –                   |         | 295          | 102 (34.5) | 1 (Reference)       |         | –                   |         |
| ≥5g                                                                  | 90           | 33 (36.4)  | 0.82 (0.495-1.365) | 0.45    | –                   |         | 58           | 16 (27.4)  | 0.63 (0.347-1.156)  | 0.14    | –                   |         |

|                                                   |     |     |         |      |                |      |      |             |      |     |         |        |                |             |       |             |             |      |
|---------------------------------------------------|-----|-----|---------|------|----------------|------|------|-------------|------|-----|---------|--------|----------------|-------------|-------|-------------|-------------|------|
| Don't know                                        | 16  | 11  | (65.6)  | –    | –              | –    | –    | –           | 1    | 1   | (100.0) | –      | –              | –           | –     |             |             |      |
| Cooking oil intake                                |     |     |         |      |                |      |      |             |      |     |         |        |                |             |       |             |             |      |
| Low <20.83ml                                      | 244 | 103 | (42.2)  | 1    | (Reference)    | –    | –    | –           | 266  | 95  | (35.7)  | 1      | (Reference)    | –           | –     |             |             |      |
| High ≥20.83ml                                     | 92  | 30  | (33.1)  | 0.72 | (0.429-1.218)  | 0.22 | –    | –           | 85   | 24  | (27.7)  | 0.71   | (0.420-1.203)  | 0.20        | –     |             |             |      |
| Don't know                                        | –   | –   | –       | –    | –              | –    | –    | –           | 1    | 0   | (0.0)   | –      | –              | –           | –     |             |             |      |
| No data                                           | –   | –   | –       | –    | –              | –    | –    | –           | 2    | 0   | (0.0)   | –      | –              | –           | –     |             |             |      |
| Sugar intake                                      |     |     |         |      |                |      |      |             |      |     |         |        |                |             |       |             |             |      |
| Low <28.0g                                        | 168 | 70  | (42.0)  | 1    | (Reference)    | –    | –    | –           | 185  | 66  | (35.6)  | 1      | (Reference)    | –           | –     |             |             |      |
| High ≥28.0g                                       | 167 | 62  | (37.0)  | 0.73 | (0.464-1.139)  | 0.16 | –    | –           | 168  | 52  | (30.9)  | 0.73   | (0.471-1.140)  | 0.17        | –     |             |             |      |
| No data                                           | 1   | 1   | (100.0) | –    | –              | –    | –    | –           | 1    | 1   | (100.0) | –      | –              | –           | –     |             |             |      |
| Psychological distress (K6)                       |     |     |         |      |                |      |      |             |      |     |         |        |                |             |       |             |             |      |
| Low                                               | 166 | 58  | (35.0)  | 1    | (Reference)    | –    | –    | –           | 169  | 77  | (45.3)  | 1      | (Reference)    | –           | –     |             |             |      |
| High (10 and over)                                | 169 | 56  | (32.8)  | 0.73 | (0.463-1.137)  | 0.16 | –    | –           | 184  | 94  | (51.1)  | 0.97   | (0.627-1.508)  | 0.90        | –     |             |             |      |
| <b>Clinical characteristics</b>                   |     |     |         |      |                |      |      |             |      |     |         |        |                |             |       |             |             |      |
| Body mass index (kg/m <sup>2</sup> ) <sup>c</sup> |     |     |         |      |                |      |      |             |      |     |         |        |                |             |       |             |             |      |
| Normal (<25)                                      | 281 | 106 | (37.9)  | 1    | (Reference)    | –    | 1    | (Reference) | 224  | 61  | (27.1)  | 1      | (Reference)    | –           | 1     | (Reference) |             |      |
| Overweight/Obese (≥25)                            | 54  | 27  | (49.1)  | 2.04 | (1.13-3.70)    | 0.02 | 1.73 | (0.91-3.29) | 0.09 | 130 | 58      | (44.7) | 2.51           | (1.59-3.94) | <0.01 | 1.98        | (1.18-3.29) | 0.01 |
| Blood lipids                                      |     |     |         |      |                |      |      |             |      |     |         |        |                |             |       |             |             |      |
| Normal                                            | 70  | 27  | (39.0)  | 1    | (Reference)    | –    | –    | –           | 42   | 9   | (22.2)  | 1      | (Reference)    | –           | –     |             |             |      |
| Abnormal                                          | 263 | 106 | (40.3)  | 1.09 | (0.630-1.887)  | 0.76 | –    | –           | 310  | 109 | (35.2)  | 1.56   | (0.758-3.220)  | 0.23        | –     |             |             |      |
| No data                                           | 3   | 0   | (0.0)   | –    | –              | –    | –    | –           | 3    | 1   | (20.0)  | –      | –              | –           | –     |             |             |      |
| HbA1c                                             |     |     |         |      |                |      |      |             |      |     |         |        |                |             |       |             |             |      |
| Normal (<5.7)                                     | 222 | 89  | (40.1)  | 1    | (Reference)    | –    | –    | –           | 182  | 55  | (30.1)  | 1      | (Reference)    | –           | 1     | (Reference) |             |      |
| High risk (5.7-6.4)                               | 111 | 42  | (38.1)  | 0.81 | (0.502-1.320)  | 0.40 | –    | –           | 156  | 54  | (34.7)  | 1.38   | (0.879-2.179)  | 0.16        | 1.02  | (0.61-1.71) | 0.93        |      |
| Diabetes (≥6.5)                                   | 3   | 2   | (66.7)  | 3.30 | (0.295-36.973) | 0.33 | –    | –           | 15   | 10  | (65.5)  | 4.87   | (1.588-14.921) | <0.01       | 2.33  | (0.68-7.96) | 0.18        |      |
| No data                                           | 0   | 0   | (0.0)   | –    | –              | –    | –    | –           | 1    | 0   | (0.0)   | –      | –              | –           | –     | –           |             |      |
| <b>Medical history (self-reported)</b>            |     |     |         |      |                |      |      |             |      |     |         |        |                |             |       |             |             |      |
| HIV infection (Self-reported)                     |     |     |         |      |                |      |      |             |      |     |         |        |                |             |       |             |             |      |
| No                                                | 307 | 124 | (40.4)  | 1    | (Reference)    | –    | –    | –           | 311  | 108 | (34.9)  | 1      | (Reference)    | –           | 1     | (Reference) |             |      |
| Yes                                               | 28  | 9   | (32.7)  | 0.77 | (0.338-1.743)  | 0.53 | –    | –           | 43   | 10  | (23.8)  | 0.47   | (0.226-0.983)  | 0.045       | 0.54  | (0.24-1.24) | 0.15        |      |

Totals of percentages may differ from 100 due to rounding. Weighted values are rounded to the nearest integer.

"No data" and "Don't know" excludes from statistical test

Hypertension is defined as SBP 140 ≥ mmHg or DBP ≥90 mmHg.

Abnormal blood lipid includes any abnormal measurements in total cholesterol, triglyceride, LDL-cholesterol, or HDL-cholesterol

Cooking oil intake is defined as low and high by median (20.83ml).

Sugar intake is defined as low and high by median (28.0g).

**Table 3: Bivariate and multivariate correlates of ‘never had blood pressure measured’ (Women)**

|                                           | Female (n=354) | Never had blood pressure measured (n=24) |                   |         |                    |         |
|-------------------------------------------|----------------|------------------------------------------|-------------------|---------|--------------------|---------|
|                                           | Total          | n of total (%)                           | Crude OR (95CI)   | p value | Adjusted OR (95CI) | p value |
| <b>Age</b>                                |                |                                          |                   |         |                    |         |
| 25-44                                     | 226            | 6 (2.5)                                  | 1 (reference)     |         | 1 (reference)      |         |
| 45-64                                     | 128            | 19 (14.5)                                | 5.33 (2.18-13.06) | <0.01   | 4.53 (1.81-11.35)  | <0.01   |
| <b>Residential area</b>                   |                |                                          |                   |         |                    |         |
| Urban                                     | 52             | 4 (6.9)                                  | 1 (reference)     |         | —                  |         |
| Rural                                     | 302            | 21 (6.8)                                 | 1.39 (0.40-4.81)  | 0.60    | —                  |         |
| <b>Education</b>                          |                |                                          |                   |         |                    |         |
| <=primary                                 | 284            | 19 (6.7)                                 | 1 (reference)     |         | —                  |         |
| >=Secondary                               | 70             | 5 (7.3)                                  | 0.997 (0.36-2.75) | 0.995   | —                  |         |
| <b>Work Status</b>                        |                |                                          |                   |         |                    |         |
| Employed                                  | 28             | 3 (9.3)                                  | 1 (reference)     |         | —                  |         |
| Unemployed/Retired                        | 326            | 22 (6.6)                                 | 0.71 (0.20-2.50)  | 0.59    | —                  |         |
| <b>HIV infection</b>                      |                |                                          |                   |         |                    |         |
| No                                        | 311            | 23 (7.3)                                 | 1 (reference)     |         | —                  |         |
| Yes                                       | 43             | 2 (3.6)                                  | 0.83 (0.24-2.89)  | 0.77    | —                  |         |
| <b>Smoking</b>                            |                |                                          |                   |         |                    |         |
| Never, Ex-smoker                          | 352            | 24 (6.7)                                 | 1 (reference)     |         | —                  |         |
| Current smoker                            | 3              | 1 (20.0)                                 | 6.60 (0.58-75.32) | 0.13    | —                  |         |
| <b>Alcohol</b>                            |                |                                          |                   |         |                    |         |
| Never or a few times/m                    | 335            | 20 (6.0)                                 | 1 (reference)     |         | 1 (reference)      |         |
| ≥a few times/w or everyday                | 20             | 4 (21.1)                                 | 3.37 (1.04-10.88) | 0.04    | 2.19 (0.65-7.43)   | 0.21    |
| <b>Body mass index (kg/m<sup>2</sup>)</b> |                |                                          |                   |         |                    |         |
| Normal (<25)                              | 224            | 11 (4.8)                                 | 1 (reference)     |         | 1 (reference)      |         |
| Overweight/Obese (25 and over)            | 130            | 13 (10.3)                                | 2.12 (0.95-4.72)  | 0.07    | 1.71 (0.74-3.92)   | 0.21    |

Data are numbers (%).

Totals of percentages may differ from 100 due to rounding. Weighted values are rounded to the nearest integer.

OR: Odds ratio

**Table 4: Bivariate and multivariate correlates of ‘never had blood pressure measured’ (Overall)**

|                                           | Overall (n=689) | Never had blood pressure measured (n=150) |                   |         |                    |         |
|-------------------------------------------|-----------------|-------------------------------------------|-------------------|---------|--------------------|---------|
|                                           | Total           | n of total (%)                            | Crude OR (95CI)   | p value | Adjusted OR (95CI) | p value |
| <b>Gender</b>                             |                 |                                           |                   |         |                    |         |
| Male                                      | 335             | 125 (37.4)                                | 7.71 (4.88-12.18) | <0.01   | 6.27 (3.84-10.23)  | <0.01   |
| Female                                    | 354             | 24 (6.8)                                  | 1 (reference)     |         | 1 (reference)      |         |
| <b>Age</b>                                |                 |                                           |                   |         |                    |         |
| 25-44                                     | 429             | 89 (20.7)                                 | 1 (reference)     |         | —                  |         |
| 45-64                                     | 260             | 61 (23.3)                                 | 0.90 (0.61-1.31)  | 0.57    | —                  |         |
| <b>Residential area</b>                   |                 |                                           |                   |         |                    |         |
| Urban                                     | 87              | 9 (10.7)                                  | 1 (reference)     |         | 1 (reference)      |         |
| Rural                                     | 602             | 140 (23.3)                                | 3.02 (1.43-6.41)  | <0.01   | 2.70 (1.22-5.98)   | 0.01    |
| <b>Education</b>                          |                 |                                           |                   |         |                    |         |
| <=primary                                 | 513             | 115 (22.5)                                | 1 (reference)     |         | —                  |         |
| >=Secondary                               | 177             | 34 (19.5)                                 | 0.96 (0.63-1.45)  | 0.84    | —                  |         |
| <b>Work Status</b>                        |                 |                                           |                   |         |                    |         |
| Employed                                  | 85              | 16 (18.7)                                 | 1 (reference)     |         | —                  |         |
| Unemployed/Retired                        | 604             | 134 (22.1)                                | 1.16 (0.67-2.01)  | 0.60    | —                  |         |
| <b>HIV infection</b>                      |                 |                                           |                   |         |                    |         |
| No                                        | 618             | 141 (22.9)                                | 1 (reference)     |         | 1 (reference)      |         |
| Yes                                       | 71              | 8 (11.5)                                  | 0.44 (0.21-0.90)  | 0.03    | 0.46 (0.21-0.995)  | 0.049   |
| <b>Smoking</b>                            |                 |                                           |                   |         |                    |         |
| Never, Ex-smoker                          | 611             | 111 (18.2)                                | 1 (reference)     |         | 1 (reference)      |         |
| Current smoker                            | 79              | 39 (49.0)                                 | 4.46 (2.74-7.28)  | <0.01   | 2.11 (1.19-3.73)   | 0.01    |
| <b>Alcohol</b>                            |                 |                                           |                   |         |                    |         |
| Never or a few times/m                    | 560             | 105 (18.8)                                | 1 (reference)     |         | 1 (reference)      |         |
| ≥a few times/w or everyday                | 130             | 44 (34.1)                                 | 2.29 (1.50-3.50)  | <0.01   | 0.93 (0.55-1.55)   | 0.77    |
| <b>Body mass index (kg/m<sup>2</sup>)</b> |                 |                                           |                   |         |                    |         |
| Normal (<25)                              | 505             | 122 (24.1)                                | 1 (reference)     |         | 1 (reference)      |         |
| Overweight/Obese (25 and over)            | 185             | 28 (15.0)                                 | 0.50 (0.31-0.79)  | <0.01   | 0.91 (0.55-1.53)   | 0.73    |

Data are numbers (%).

Totals of percentages may differ from 100 due to rounding. Weighted values are rounded to the nearest integer.

OR: Odds ratio
